# Supplementary material for: Rapid detection of Clostridium difficile via magnetic bead aggregation in cost-effective polyester microdevices with cell phone image analysis
Source: Royal Society of Chemistry journal article supplement (doi:10.1039/c6an00674d), 2016-01-01
Supplement: c6an00674d1.pdf [file c6an00674d1.pdf]

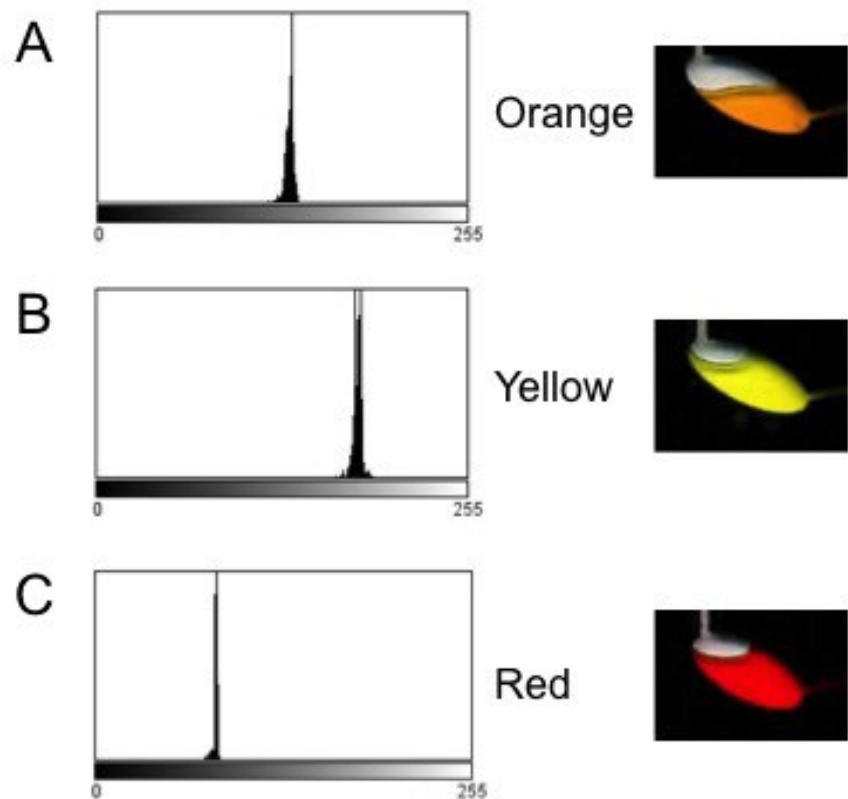

**SI Figure 1. Histograms from dye studies.** **A)** Orange dye was mixed off-chip using the same ratio of yellow: red dye (4:1) that was used in Fig. 2B and added to the LAMP chamber. **B)** Yellow dye was added to the LAMP chamber. **C)** Red dye was added to LAMP chamber.
